# Supplementary material
Source: PubMed Central journal article supplement (PMC10064396)

# Visual Dictionary for Dental Anomalies

Brian J. Howe DMD, MS

Update 03/2016

# General Rules for Scoring Photos

- When permanent tooth is erupting and remnants of primary tooth is still present = say that permanent tooth is present and not the primary tooth.
- If tooth is blurry, and unable to clearly see outline of tooth = not visible
- If teeth are not visible in photo = not visible
- If unable to tell what tooth is present (position of the tooth) = not visible, unable to tell position
- If root tips and unable to tell position of the tooth = not visible/unable to tell position, root tips
- If primary teeth present and permanent first molar and posterior have not erupted = not present – missing age appropriate
- If primary teeth present and permanent first molar erupted, but second permanent molar not erupted = not present – missing age appropriate
- If permanent second molar erupted and permanent canine not erupted = not present, impacted
- If 3<sup>rd</sup> molars are not present, with no history of 3<sup>rd</sup> molar extractions, = not visible

# Hypoplasia

Pits, grooves, or larger areas of missing enamel

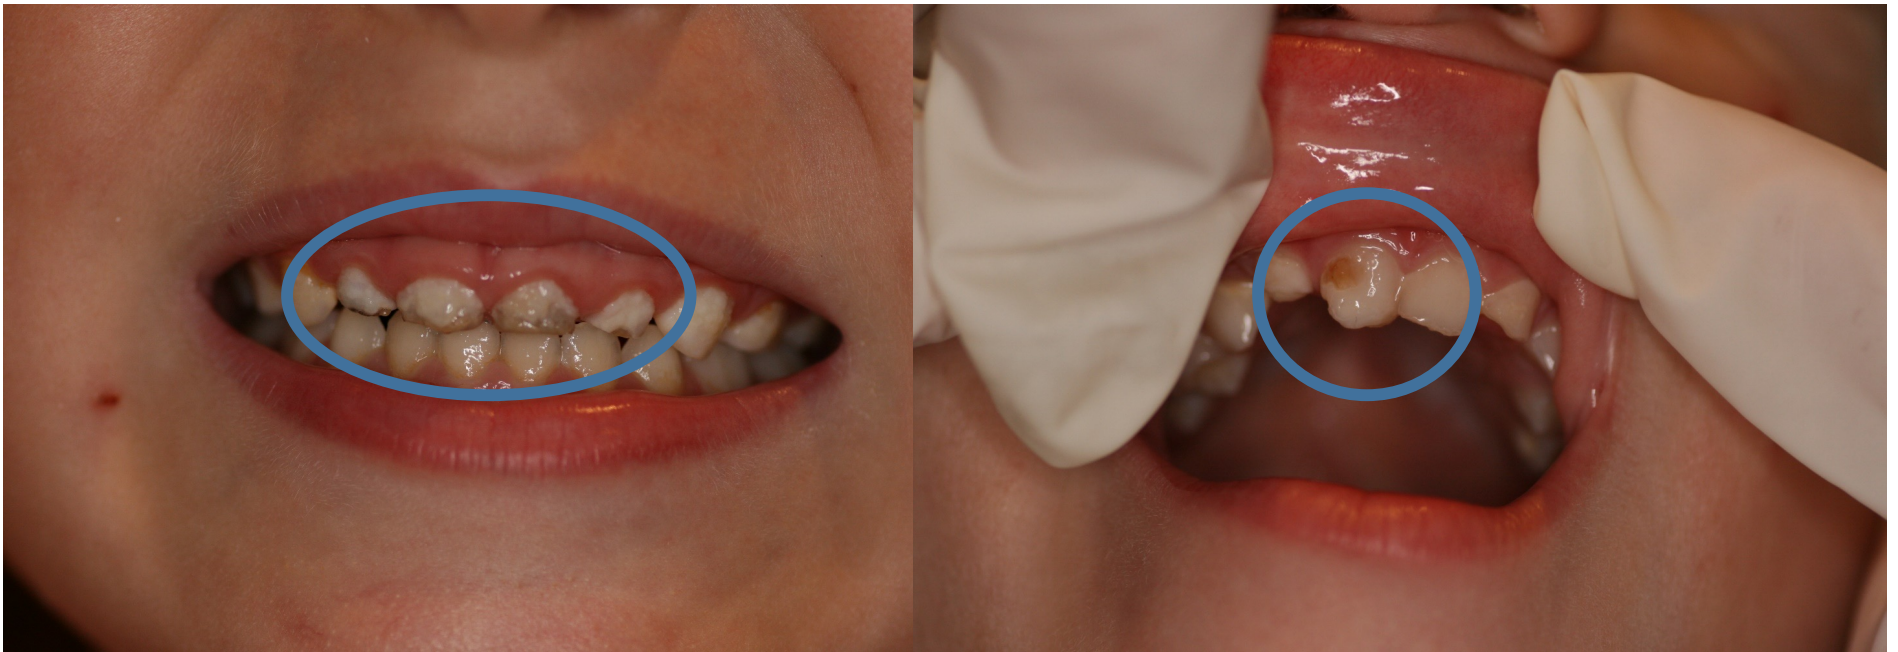

**Hypoplasia: A defect involving the surface of the enamel associated with a reduced thickness of enamel. It can occur in the forms of pits, grooves, or large areas of missing enamel.**

# Hypoplasia

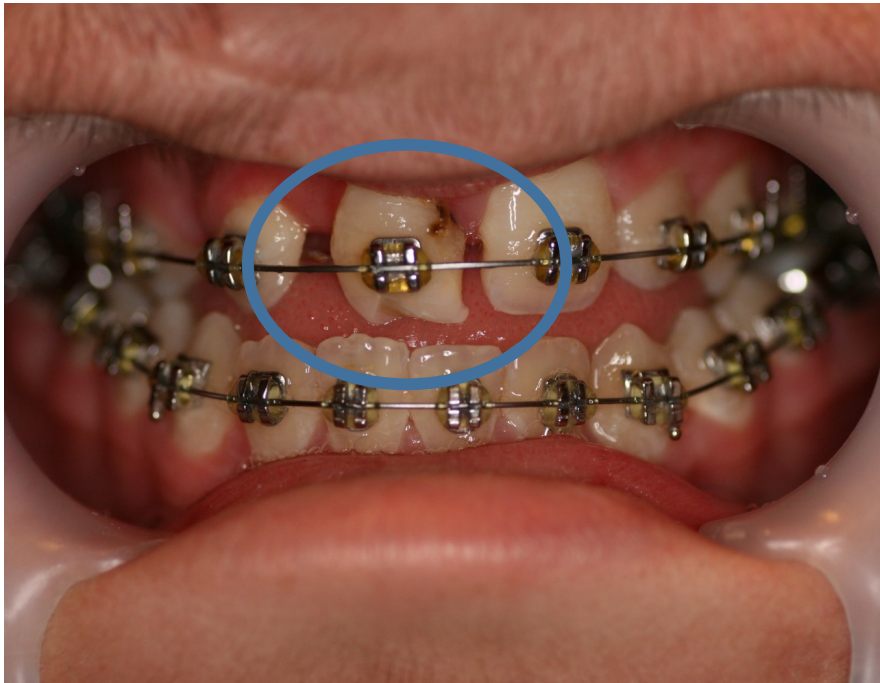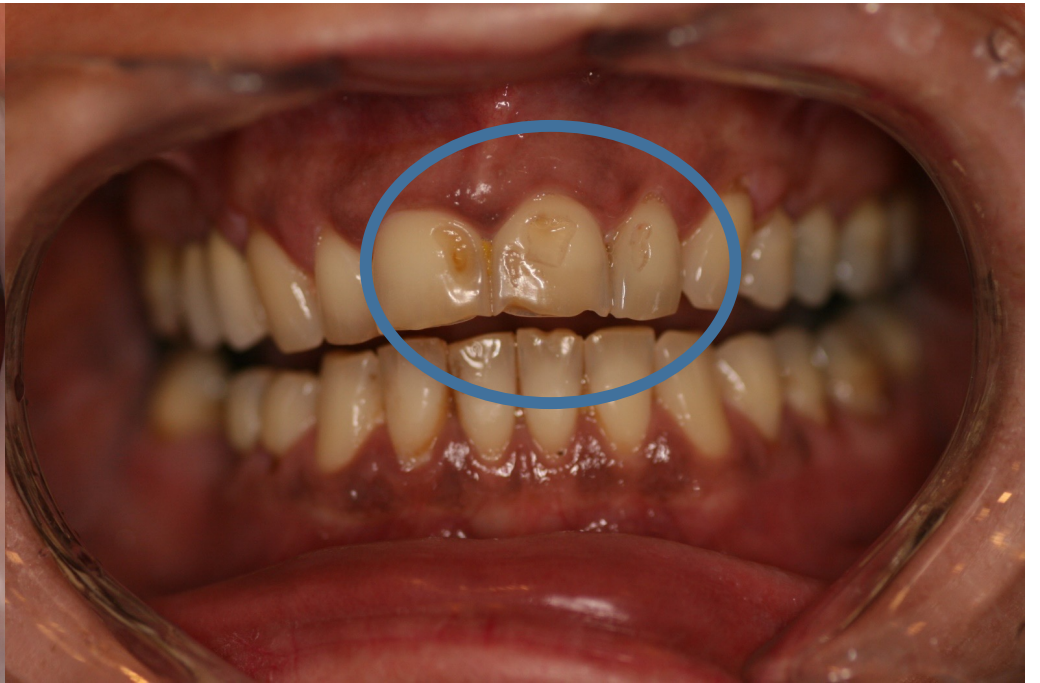

# Hypoplasia

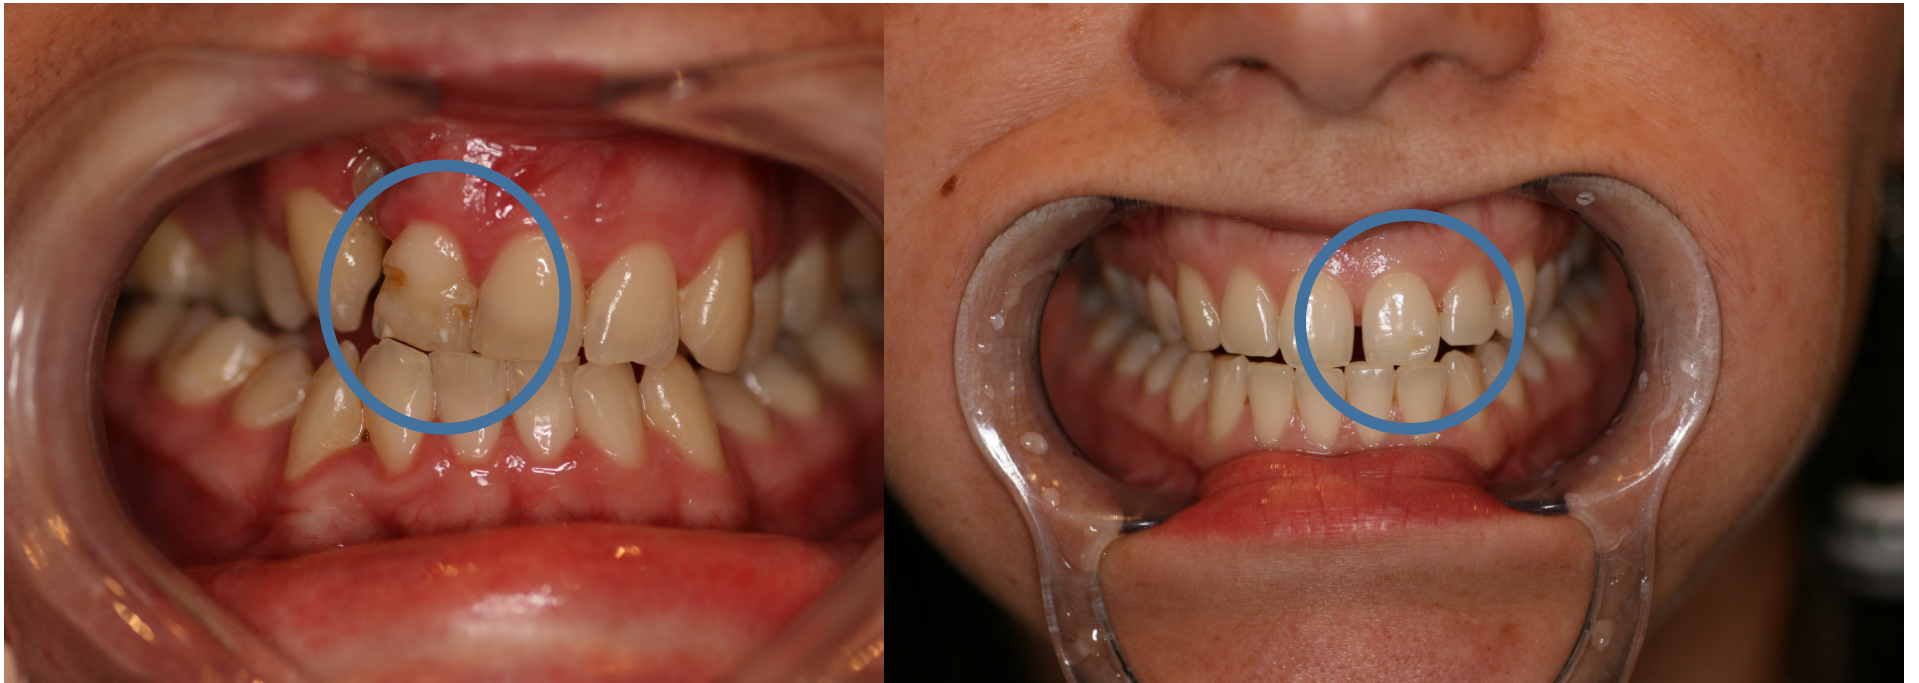

# Hypocalcification

Areas of white opacity on the tooth, not associated or directly adjacent to areas of decay

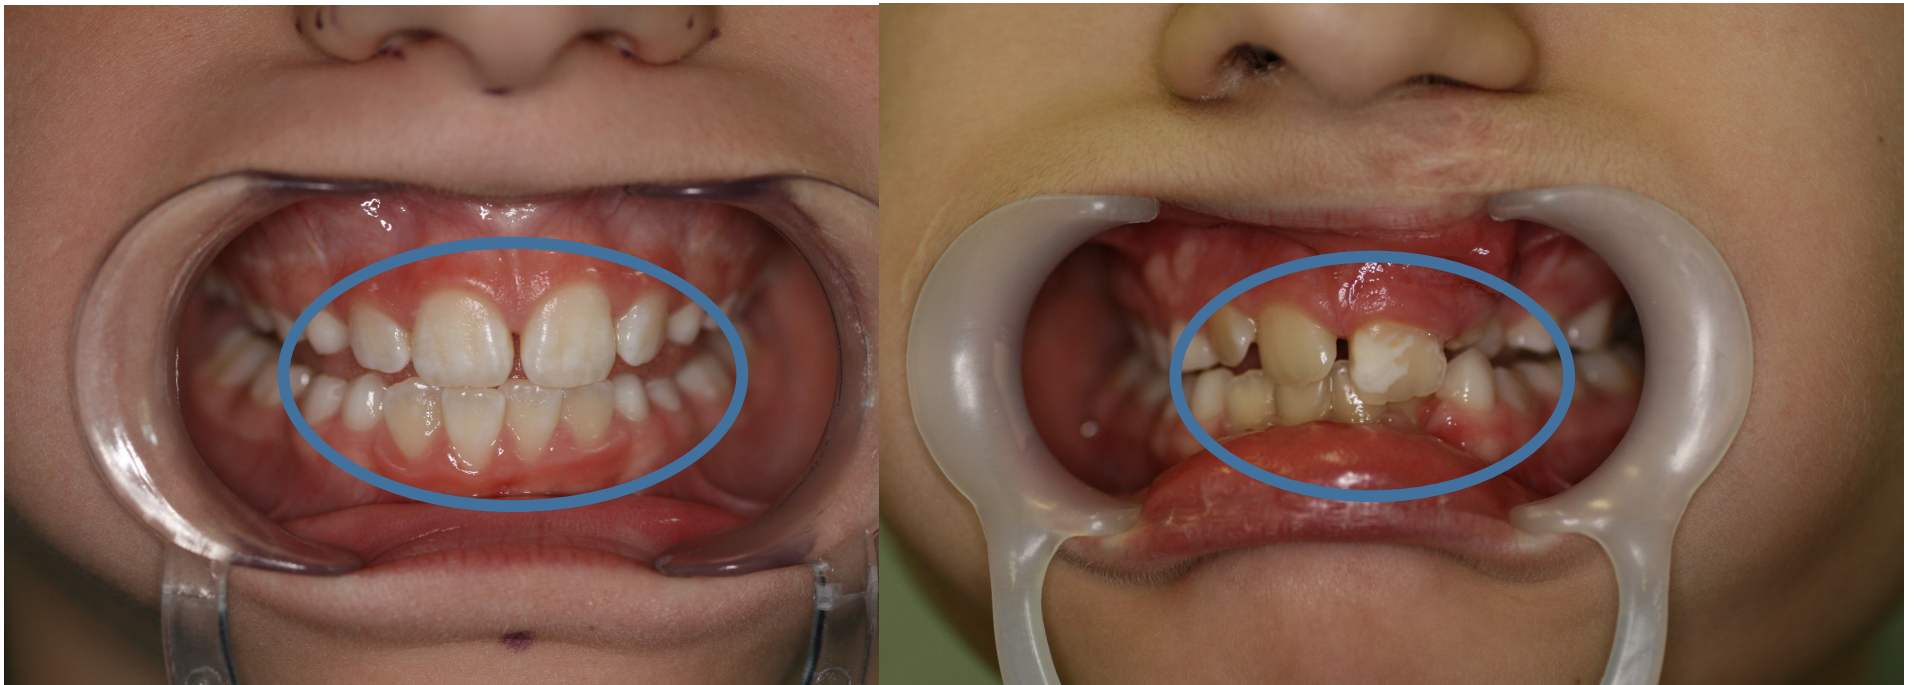

**Hypocalcification: defect in enamel characterized by reduced calcification**

# Hypocalcification

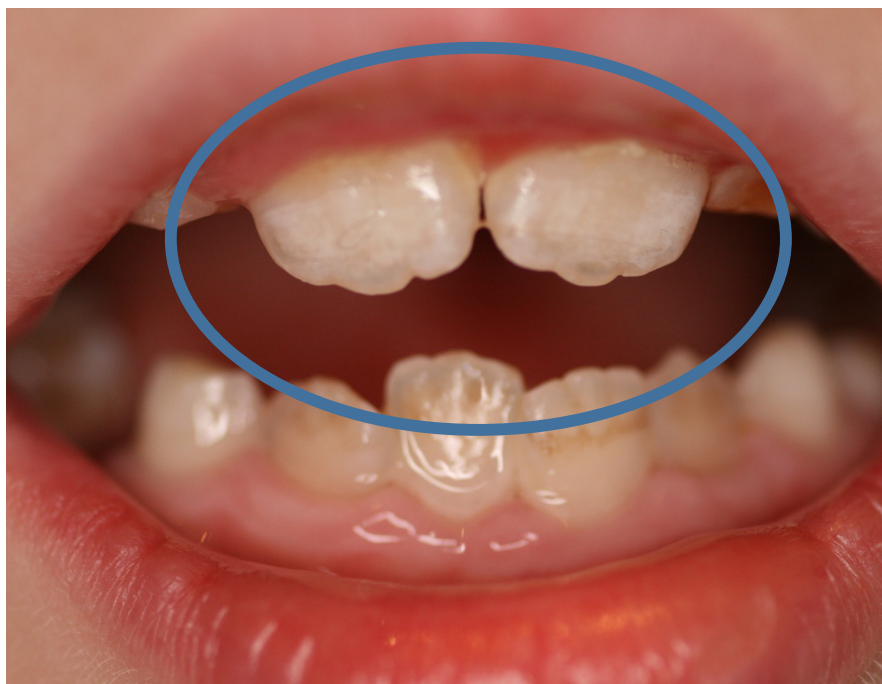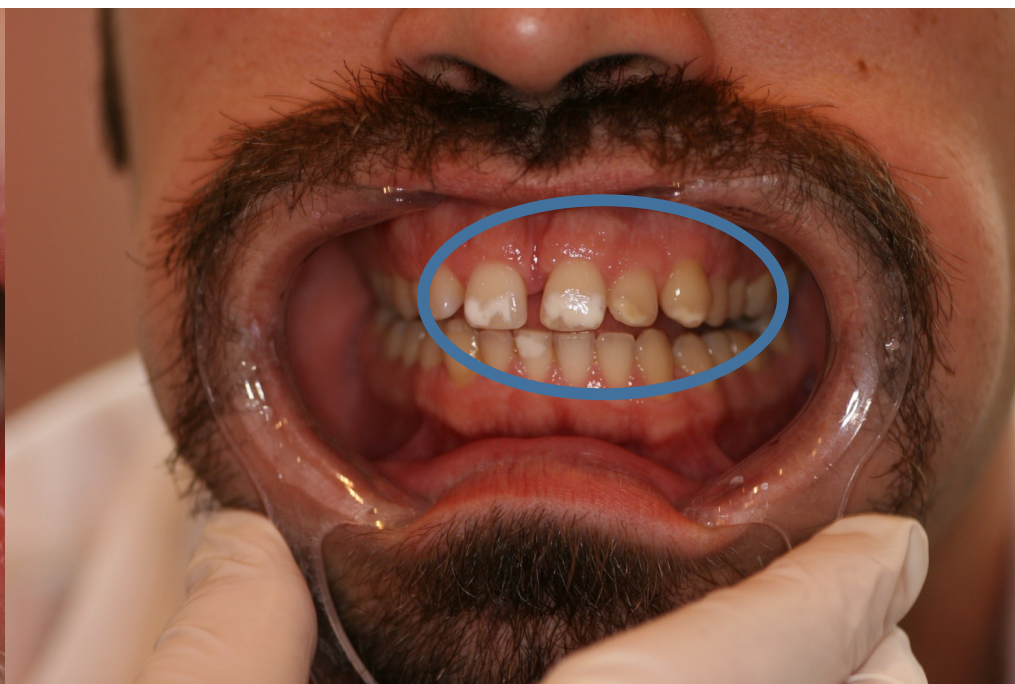

# Hypocalcification

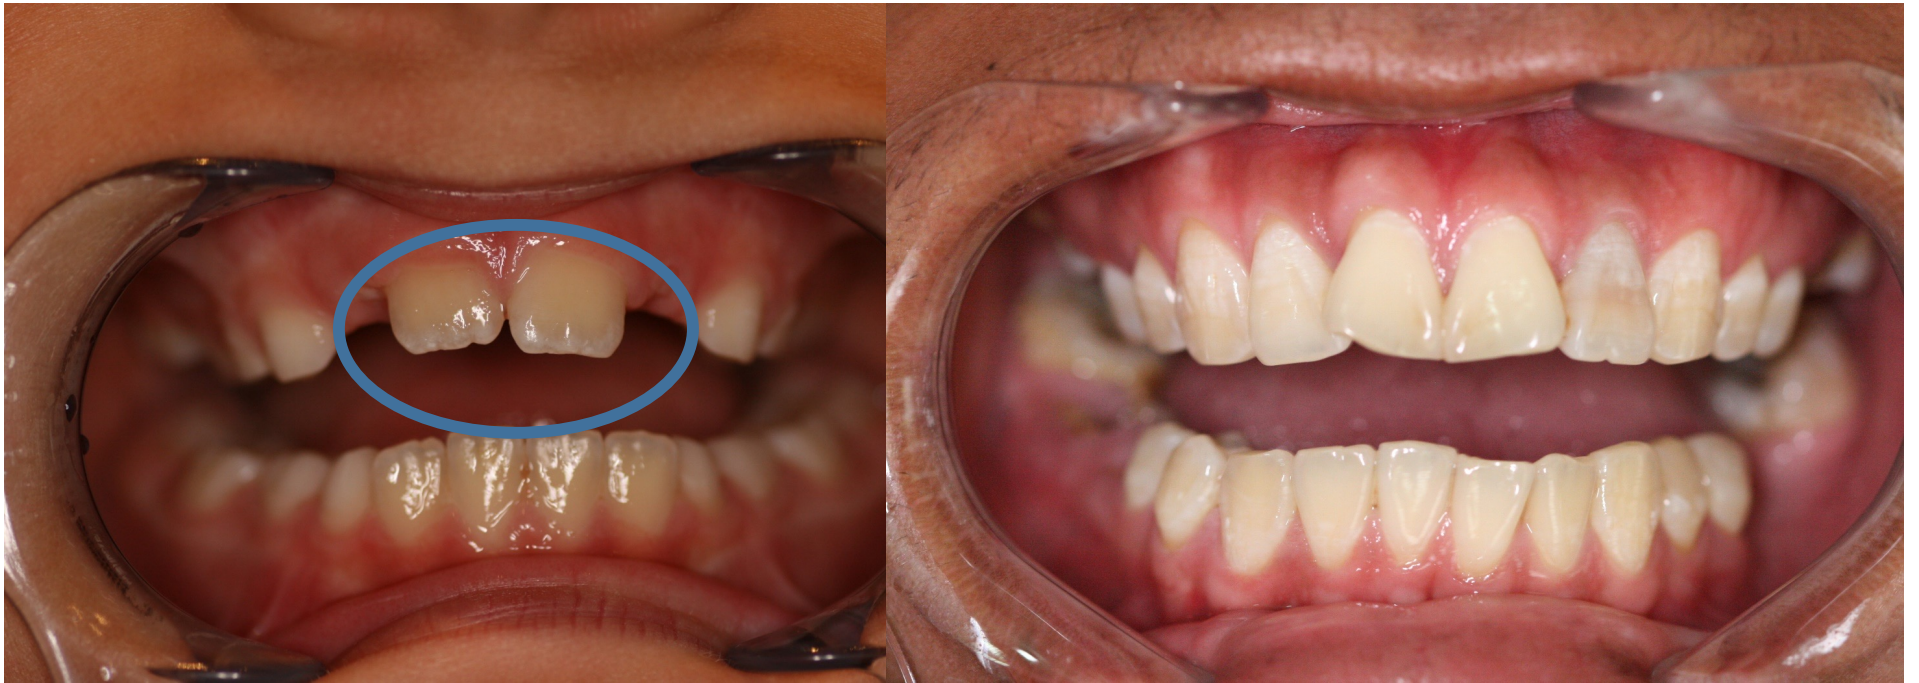

Supplement: hhe-0087-0034-s02.pdf [file hhe-0087-0034-s02.pdf]
